# Supplementary material
Source: Springer Nature journal article supplement (https://www.springermedizin.de/resource/supplementary/12979_2013_177_MOESM1_ESM.pdf/9603166)

**A**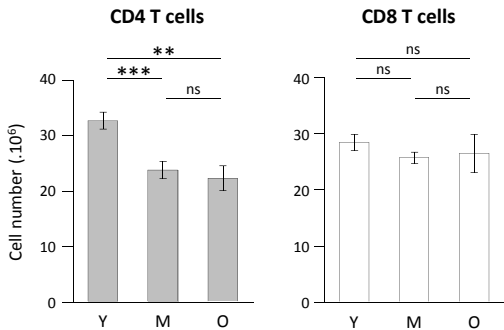**B**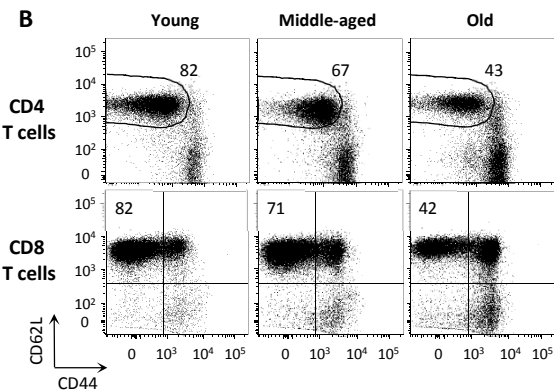**C**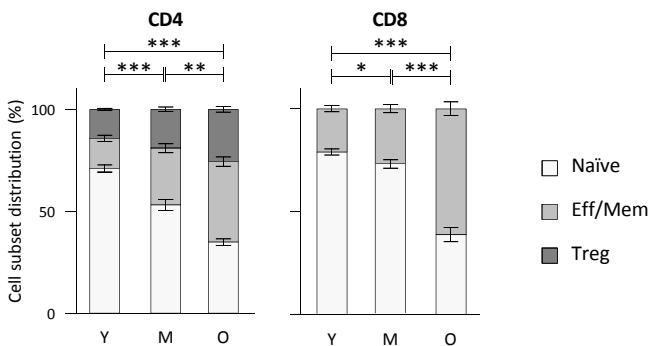

Supplement: MOESM1 [file 9603166]
